# Supplementary material for: The effect of meta coupling on colour purity, quantum yield, and exciton utilizing efficiency in deep-blue emitters from phenanthroimidazole isomers
Source: Royal Society of Chemistry journal article supplement (doi:10.1039/c5cp05097a), 2015-01-01
Supplement: c5cp05097a1.pdf [file c5cp05097a1.pdf]

Supporting Information

*for Physical Chemistry Chemical Physics*

## Supporting Information

### **Effect of Meta Coupling on Colour Purity, Quantum Yield, and Excitons Utilizing Efficiency in Deep-Blue Emitters from Phenanthroimidazole Isomers**

*Zhiming Wang<sup>[a,d]\*</sup>, Xueming Li<sup>[a]</sup>, Wanyu Zhang<sup>[a]</sup>, Shitong Zhang<sup>[b]</sup>, Hui Li<sup>[a]</sup>, Zhenqiang Yu<sup>[d]</sup>, Yanming Chen<sup>[a]</sup>, Ping Lu<sup>[b]</sup>, and Ping Chen<sup>[c]</sup>*

<sup>[a]</sup> School of Petrochemical Engineering, Shenyang University of Technology, 30 Guanghua Street, Liaoyang, 111003, P. R. China

<sup>[b]</sup> State Key Laboratory of Supramolecular Structure and Materials, Jilin University, 2699 Qianjin Avenue, Changchun 130012, P.R. China.

<sup>[c]</sup> State Key Laboratory on Integrated Optoelectronics, College of Electronic Science and Engineering, Jilin University, 2699 Qianjin Avenue, Changchun 130012, P.R. China;

<sup>[d]</sup> Shenzhen Research Institute, The Hong Kong University of Science & Technology, No. 9 Yuxing 1st RD, South Area Hi-tech Park, Nanshan, Shenzhen 518057, China.

#### **Contents**

- 1. S3 to S5 and T3 to T5 NTOs of BPPI, L-BPPI and Z-BPPI (Fig.S1 to Fig.S3)**
- 2. The solvatochromic Lippert-Mataga model (Tab.S1 to Tab.S3)**
- 3. Electroluminescence devices of BPPI, L-BPPI and Z-BPPI (Fig.S4 to Fig.S6)**

1. S3 to S5 and T3 to T5 NTOs of BPPI, L-BPPI and Z-BPPI (Fig.S1 to Fig.S3)

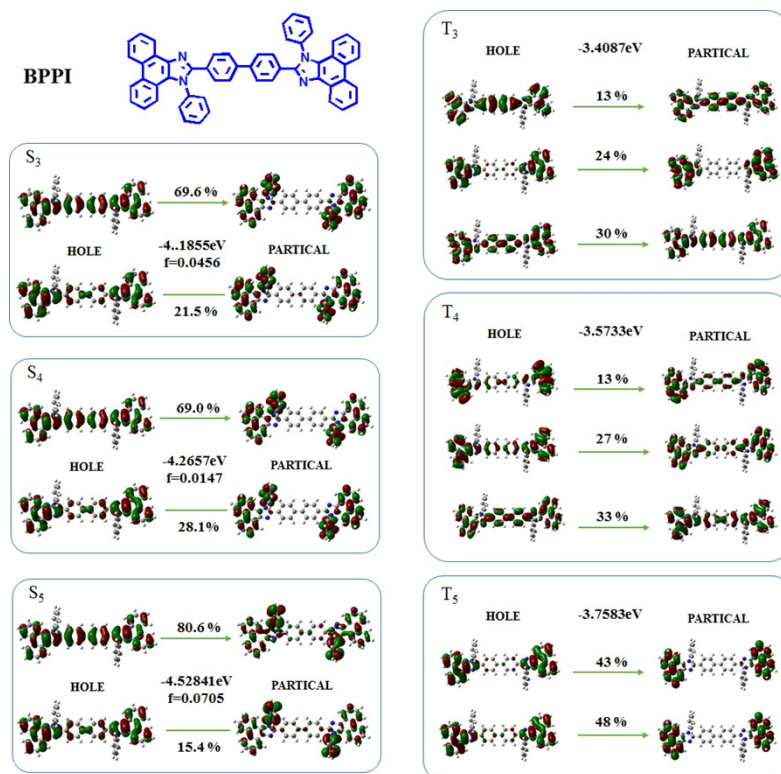

Fig. S1 S3 to S5 and T3 to T5 NTOs of BPPI

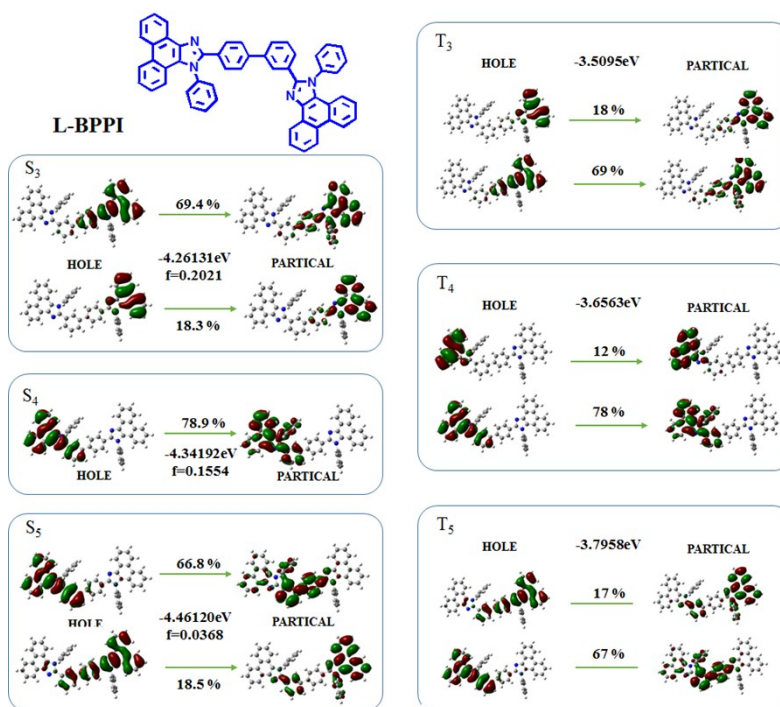

Fig. S2 S3 to S5 and T3 to T5 NTOs of L-BPPI

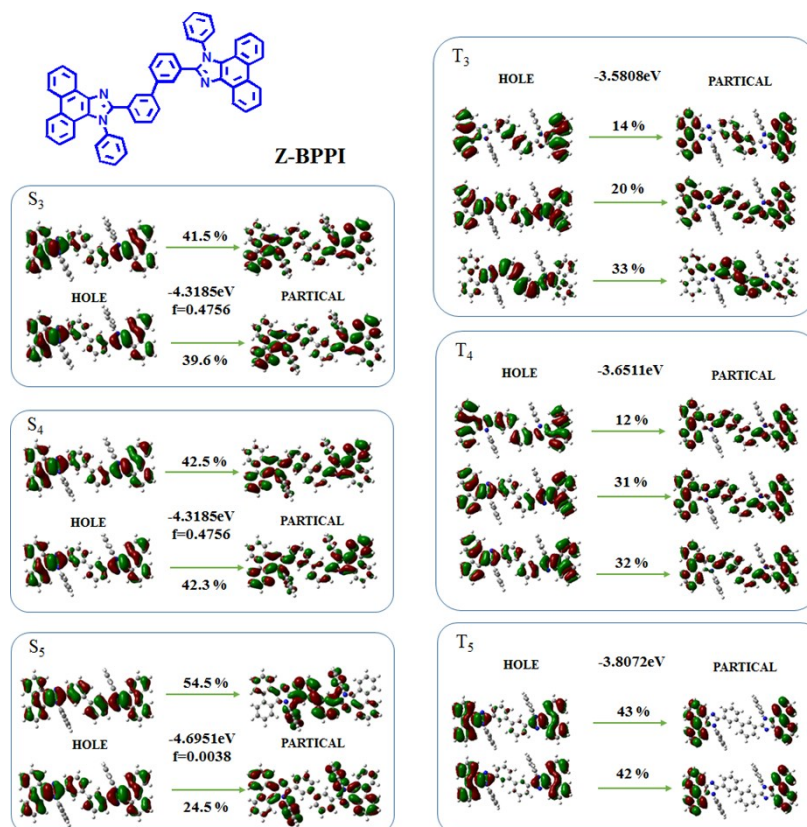

**Fig. S3 S3 to S5 and T3 to T5 NTOs of Z-BPPI**

## 2. The solvatochromic Lippert-Mataga model

The Lippert-Mataga model is estimated according to **Equation 1** as shown below:

$$hc(\nu_a - \nu_f) = hc(\nu_a^0 - \nu_f^0) + \frac{2(\mu_e - \mu_g)^2}{a_0^3} f(\epsilon, n) \quad \text{Equation S1}$$

where  $h$  is the Plank constant,  $c$  is the light speed in vacuum,  $f(\epsilon, n)$  is the orientational polarizability of

solvents and  $f(\epsilon, n) = \left[ \frac{\epsilon - 1}{2\epsilon + 1} - \frac{n^2 - 1}{2n^2 - 1} \right]$ ,  $\nu_a - \nu_f$  is the Stokes shifts when  $f$  is zero,  $a_0$  is the solvent

Onsager cavity radius,  $\mu_e$  and  $\mu_g$  are dipole moments of excited-state and ground-state, respectively.  $\epsilon$  is the solvent dielectric constant and  $n$  is the solvent refractive index.  $a_0$  and  $\mu_g$  were estimated at the level of b3lyp/6-31g(d,p) from the Gaussian09 package.

**Table-S1 The solvatochromic properties of BPPI ( $a_0=0.714$  nm and  $\mu_g = 4.579$ D)**

| BPPI       |                  |                  |                  |                                     |
|------------|------------------|------------------|------------------|-------------------------------------|
| Solvents   | $f(\epsilon, n)$ | $\lambda_a$ (nm) | $\lambda_f$ (nm) | $\nu_a - \nu_f$ (cm <sup>-1</sup> ) |
| Hexane     | 0.0012           | 368              | 412              | 2902.06838                          |
| Ethylamine | 0.048            | 369              | 414              | 2945.68163                          |
| Butylether | 0.096            | 370              | 415              | 2930.64148                          |

|                 |       |     |     |            |
|-----------------|-------|-----|-----|------------|
| Ethylether      | 0.167 | 368 | 415 | 3077.52750 |
| Ethylacetate    | 0.2   | 368 | 419 | 3307.56459 |
| Tetrahydrofuran | 0.21  | 369 | 421 | 3347.30188 |
| Acetone         | 0.284 | 366 | 443 | 4749.04094 |
| Acetonitrile    | 0.305 | 365 | 445 | 4925.35016 |

Results: In low-polarity solvents (the former six):

Slope = 2093.37370337; Correlation = 0.90452685;  $\mu_e = 7.80178524$

In high-polarity solvents (the latter five):

Slope = 14721.10104476; Correlation = 0.98619292;  $\mu_e = 20.68905984$

**Table-S2 The solvatochromic properties of L-BPPI ( $a_0=0.714$  nm and  $\mu_g = 3.872$ D)**

| L-BPPI          |                  |                  |                  |                                     |
|-----------------|------------------|------------------|------------------|-------------------------------------|
| Solvents        | $f(\epsilon, n)$ | $\lambda_a$ (nm) | $\lambda_f$ (nm) | $\nu_a - \nu_f$ (cm <sup>-1</sup> ) |
| Hexane          | 0.0012           | 363              | 383              | 1438.54879                          |
| Ethylamine      | 0.048            | 364              | 386              | 1565.79172                          |
| Butylether      | 0.096            | 363              | 387              | 1708.41608                          |
| Ethylether      | 0.167            | 363              | 389              | 1841.26849                          |
| Ethylacetate    | 0.2              | 362              | 399              | 2561.65275                          |
| Tetrahydrofuran | 0.21             | 363              | 401              | 2610.55351                          |
| Acetone         | 0.284            | 362              | 415              | 3527.92385                          |
| Acetonitrile    | 0.305            | 361              | 419              | 3834.48258                          |

Results: In low-polarity solvents (the former four):

Slope = 2052.42426590; Correlation = 0.95236987;  $\mu_e = 7.72510123$

In high-polarity solvents (the latter five):

Slope = 13506.70852927; Correlation = 0.99168509;  $\mu_e = 19.81734057$

**Table-S3 The solvatochromic properties of Z-BPPI ( $a_0=0.714$  nm and  $\mu_g = 2.625$ D)**

| Z-BPPI          |                  |                  |                  |                                     |
|-----------------|------------------|------------------|------------------|-------------------------------------|
| Solvents        | $f(\epsilon, n)$ | $\lambda_a$ (nm) | $\lambda_f$ (nm) | $\nu_a - \nu_f$ (cm <sup>-1</sup> ) |
| Hexane          | 0.0012           | 362              | 366              | 301.90502                           |
| Ethylamine      | 0.048            | 363              | 368              | 374.29632                           |
| Butylether      | 0.096            | 362              | 368              | 450.39635                           |
| Ethylether      | 0.167            | 362              | 369              | 524.03839                           |
| Ethylacetate    | 0.2              | 361              | 369              | 600.56002                           |
| Tetrahydrofuran | 0.21             | 362              | 370              | 597.28237                           |

|              |       |     |     |           |
|--------------|-------|-----|-----|-----------|
| Acetone      | 0.284 | 361 | 373 | 891.17955 |
| Acetonitrile | 0.305 | 360 | 371 | 823.59988 |

Results: In all solvents:

$$\text{Slope} = 304.76060288; \text{Correlation} = 0.95532553; \mu_e = 6.99263925$$

### 3. Electroluminescence devices of BPPI, L-BPPI and Z-BPPI

The relationship between EQE and EUE.

$$\eta_{EL} = \eta_{rec} \times \eta_s \times \eta_{PL} \times \eta_{out} \quad \text{Equation S2}$$

**Equation 2.**  $\eta_{out}$  ( $\sim 1/2n^2$ ) is the light out coupling efficiency (for glass substrates,  $n=1.5$ ,  $\eta_{out}$  is estimated as  $\sim 20\%$ ),  $\eta_{rec}$  is the electron-hole recombination proportion, which is assumed to be 100%,  $\eta_{PL}$  is the quantum yield in the solid state, and  $\eta_s$  is the EUE

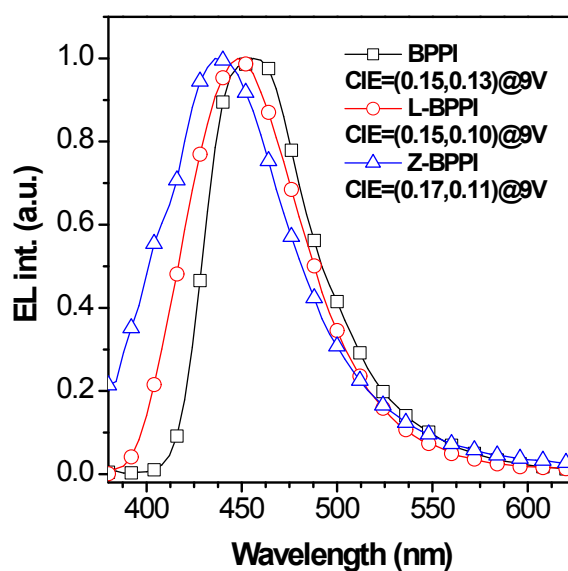

**Fig. S4** The EL spectra and their CIE @ 9V

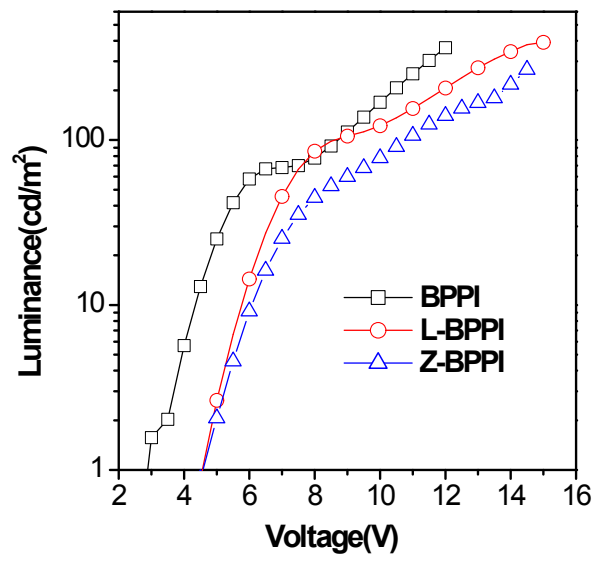

Fig. S5 The luminance versus voltage in the BPPI, L-BPPI and Z-BPPI devices

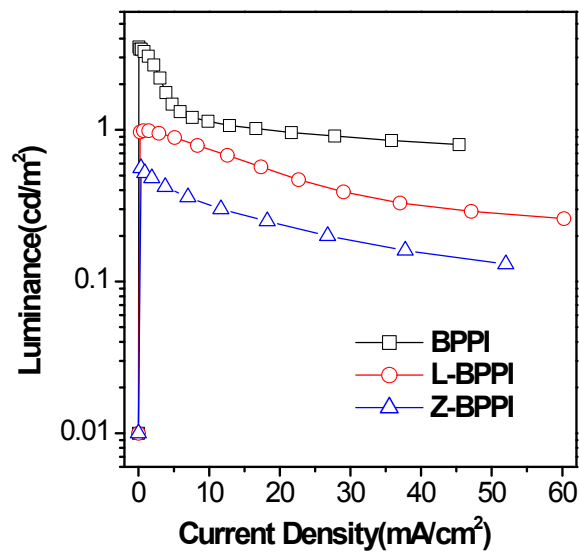

Fig. S6 The current efficiency vs current density curves in the BPPI, L-BPPI and Z-BPPI devices
